# Supplementary material for: Phenotypes of Pregnant Women Who Subsequently Develop Hypertension in Pregnancy
Source: PubMed Central journal article supplement — J Am Heart Assoc. 2018 Jul 14;7(14):e009595. doi: 10.1161/JAHA.118.009595 (PMC6064839; doi:10.1161/jaha.118.009595), 2018-07-14
Supplement: JAH3-7-e009595-s001.pdf [file JAH3-7-e009595-s001.pdf]

# **SUPPLEMENTAL MATERIAL**

**Table S1. Demographic, hemodynamic, circulating protein and pregnancy outcome characteristics of healthy pregnant and screen-positive.**

|                                                    | <b>Healthy Pregnant Women</b> | <b>Screen-Positive Women</b> | <b>P</b> |
|----------------------------------------------------|-------------------------------|------------------------------|----------|
| <b>Second Trimester Assessment</b>                 | <b>n=20</b>                   | <b>n=26</b>                  |          |
| Maternal age, years                                | 32 ± 3.0                      | 34 ± 3.8                     | 0.10     |
| Gestational age, weeks                             | 25 (23-25)                    | 25 (23-25)                   | 0.92     |
| Ethnicity                                          |                               |                              | 0.13     |
| Caucasian                                          | 15 (75)                       | 13 (50)                      |          |
| Black/Caribbean                                    | 0 (0)                         | 3 (12)                       |          |
| Asian/Indian                                       | 5 (25)                        | 10 (38)                      |          |
| BMI, kg/m <sup>2</sup>                             | 25 ± 3.7                      | 28 ± 4.3                     | 0.04     |
| Uric acid, μmol/L                                  | 202 (168-226)                 | 234 (189-274)                | 0.09     |
| <b>Maternal Hemodynamics</b>                       |                               |                              |          |
| Mean arterial pressure, mmHg                       | 77 ± 6                        | 85 ± 9                       | 0.003    |
| Heart rate, bpm                                    | 75 ± 7                        | 82 ± 12                      | 0.03     |
| Stroke volume, mL                                  | 95 (86-110)                   | 76 (66-85)                   | 0.002    |
| Cardiac output, L/min                              | 7.5 (6.5-8.3)                 | 5.8 (5.3-6.6)                | <0.0001  |
| Total peripheral resistance, dyn·s/cm <sup>5</sup> | 877 (789-1083)                | 1179 (1015-1358)             | <0.0001  |
| Pulsatility index of uterine artery                | 0.90 (0.79-0.95)              | 1.82 (1.5-2.1)               | 0.0002   |
| <b>Circulating proteins</b>                        |                               |                              |          |
| PlGF, pg/mL                                        | 444 (356-540)                 | 185 (67-341)                 | 0.0002   |
| sFlt-1, pg/mL                                      | 1072 (310-1683)               | 1871 (655-3259)              | 0.27     |
| Endoglin, ng/mL                                    | 6.2 (4.9-7.3)                 | 9.7 (5.7-14.6)               | 0.004    |
| MPO, ng/mL                                         | 25 (16-41)                    | 19 (9.5-29)                  | 0.11     |
| Endothelin, pg/mL                                  | 0.69 (0.6-1.1)                | 0.9 (0.6-1.7)                | 0.15     |
| <b>Pregnancy Outcome</b>                           | <b>n=19</b>                   | <b>n=25</b>                  |          |
| Gestational age, weeks                             | 39 (38-40)                    | 34 (33-38)                   | < 0.0001 |
| ≤34 weeks                                          | 0 (0)                         | 13 (52)                      | 0.0001   |
| Mode of delivery                                   |                               |                              | 0.07     |
| Vaginal                                            | 14 (74)                       | 11 (44)                      |          |
| Cesarean section                                   | 5 (26)                        | 14 (56)                      |          |
| Birthweight, kg                                    | 3.32 (3.1-3.7)                | 1.80 (1.3-2.6)               | < 0.0001 |
| <10 <sup>th</sup> centile                          | 2 (11)                        | 11 (44)                      | 0.02     |
| Hypertensive disorder of pregnancy                 | 1 (5)                         | 10 (40)                      | 0.01     |
| Preeclampsia                                       | 1 (5)                         | 7 (28)                       | 0.11     |
| Gestational hypertension                           | 0 (0)                         | 3 (12)                       | 0.25     |

Data are presented as mean ± SD, median (interquartile range) or n (%) as appropriate.

BMI indicates body mass index; PlGF indicates placental growth factor; sFlt-1 indicates soluble fms-like tyrosine kinase-1; MPO indicates myeloperoxidase.

**Table S2. Screening test characteristics of the individual and consolidated variables (peripheral resistance, endoglin, cardiac output and PIGF) for the prediction of hypertension in pregnancy.**

|                               | <b>AUC</b> | <b>95% CI</b> | <b>Threshold</b> | <b>Specificity</b> | <b>Sensitivity</b> | <b>Accuracy</b> |
|-------------------------------|------------|---------------|------------------|--------------------|--------------------|-----------------|
| <b>Peripheral resistance</b>  | 0.95       | 0.88-1.00     | 0.19             | 0.89               | 0.90               | 0.89            |
| <b>Endoglin</b>               | 0.93       | 0.86-1.00     | 0.11             | 0.81               | 1.00               | 0.85            |
| <b>Mean arterial pressure</b> | 0.91       | 0.83-1.00     | 0.14             | 0.75               | 1.00               | 0.80            |
| <b>PIGF</b>                   | 0.82       | 0.63-1.00     | 0.45             | 0.94               | 0.70               | 0.89            |
| <b>Cardiac output</b>         | 0.81       | 0.70-0.95     | 0.17             | 0.64               | 0.90               | 0.70            |
| <b>Pulsatility index</b>      | 0.81       | 0.67-0.95     | 0.10             | 0.56               | 1.00               | 0.65            |
| <b>Stroke volume</b>          | 0.75       | 0.59-0.92     | 0.20             | 0.69               | 0.90               | 0.74            |
| <b>sFlt-1</b>                 | 0.70       | 0.46-0.94     | 0.29             | 0.92               | 0.60               | 0.85            |
| <b>Endothelin</b>             | 0.66       | 0.46-0.86     | 0.42             | 1.00               | 0.30               | 0.85            |
| <b>BMI</b>                    | 0.59       | 0.38-0.79     | 0.19             | 0.36               | 0.90               | 0.48            |
| <b>Heart rate</b>             | 0.58       | 0.38-0.79     | 0.24             | 0.75               | 0.50               | 0.70            |
| <b>Uric acid</b>              | 0.56       | 0.35-0.77     | 0.20             | 0.53               | 0.71               | 0.57            |
| <b>MPO</b>                    | 0.53       | 0.34-0.72     | 0.20             | 0.33               | 0.90               | 0.46            |
| <b>Maternal age</b>           | 0.53       | 0.28-0.77     | 0.31             | 1.00               | 0.20               | 0.83            |
| <b>Consolidated factors</b>   | 0.98       | 0.93-1.00     | 0.39             | 0.97               | 0.90               | 0.96            |

PIGF indicates placental growth factor; sFlt-1 indicates soluble fms-like tyrosine kinase-1; BMI indicates body mass index; MPO indicates myeloperoxidase.
